1 **BiP/GRP78 is a pro-viral factor for diverse dsDNA viruses that promotes the survival and**  
2 **proliferation of cells upon KSHV infection**

3

4 Guillermo Najarro<sup>1</sup>, Kevin Brackett<sup>1</sup>, Hunter Woosley<sup>3</sup>, Catya Faeldonea<sup>1</sup>, Osvaldo Kevin  
5 Moreno<sup>1</sup>, Adriana Ramirez Negron<sup>1</sup>, Christina Love<sup>2</sup>, Ryan Ward<sup>2</sup>, Charles Langelier<sup>2,3</sup>, Brooke  
6 M. Gardner<sup>1</sup>, Carolina Arias<sup>1,3,\*</sup>

7

8 <sup>1</sup>University of California, Santa Barbara, CA 93106

9 <sup>2</sup>Department of Medicine, University of California, San Francisco, CA 94143

10 <sup>3</sup>Chan Zuckerberg BioHub, San Francisco, CA 94158

11

12 \*Corresponding author

13 Email: [Carolina.arias@czbiohub.org](mailto:Carolina.arias@czbiohub.org) (CA)

14

15 **Abstract**

16 The Endoplasmic Reticulum (ER)-resident HSP70 chaperone BiP (HSPA5) plays a crucial role  
17 in maintaining and restoring protein folding homeostasis in the ER. BiP's function is often  
18 dysregulated in cancer and virus-infected cells, conferring pro-oncogenic and pro-viral  
19 advantages. We explored BiP's functions during infection by the Kaposi's sarcoma-associated  
20 herpesvirus (KSHV), an oncogenic gamma-herpesvirus associated with cancers of  
21 immunocompromised patients. Our findings reveal that BiP protein levels are upregulated in  
22 infected epithelial cells during the lytic phase of KSHV infection. This upregulation occurs  
23 independently of the unfolded protein response (UPR), a major signaling pathway that regulates

24 BiP availability. Genetic and pharmacological inhibition of BiP halts KSHV viral replication and  
25 reduces the proliferation and survival of KSHV-infected cells. Notably, inhibition of BiP limits the  
26 spread of other alpha- and beta-herpesviruses and poxviruses with minimal toxicity for normal  
27 cells. Our work suggests that BiP is a potential target for developing broad-spectrum antiviral  
28 therapies against double-stranded DNA viruses and a promising candidate for therapeutic  
29 intervention in KSHV-related malignancies.

30

## 31 **Introduction**

32 Viruses dramatically remodel cellular physiology to accommodate the heightened biosynthetic  
33 demand for generating new viral particles. This process is orchestrated by virus-encoded factors  
34 that subvert the host protein homeostasis (proteostasis) machinery to promote the timely and  
35 optimal synthesis, folding, and maturation of proteins required for viral replication <sup>1,2</sup>. Amongst  
36 the hundreds of proteostasis factors, molecular chaperones are critical for viral infections <sup>2-5</sup>.

37 Molecular chaperones assist in folding, refolding, and translocating nascent, unfolded, or  
38 misfolded proteins to promote the acquisition of functional conformations or target terminally  
39 misfolded proteins for degradation, thus maintaining proteome integrity <sup>6,7</sup>. Viruses co-opt host  
40 chaperones, especially those belonging to the heat shock protein (HSP) family, by altering the  
41 levels, interactions, or localization of HSPs to facilitate viral entry and replication, viral protein  
42 synthesis, and virion assembly <sup>2,3</sup>. While all viruses exploit the function of chaperones in  
43 different cellular compartments, enveloped viruses, which are surrounded by an outer lipid layer  
44 acquired from the host and encode one or more glycoproteins, heavily rely on endoplasmic  
45 reticulum (ER) chaperones <sup>5,8</sup>.

46 The ER is a membrane-bound organelle where most transmembrane and secretory proteins are  
47 synthesized, folded, and modified <sup>9</sup>. A master regulator of ER functions is the Binding  
48 immunoglobulin protein/Glucose-regulated protein 78 (BiP/GRP78), an ER-resident HSP70 that  
49 assists nascent peptide folding <sup>10</sup>. BiP is also a key player in the unfolded protein response  
50 (UPR), the ER stress response <sup>11-13</sup>. BiP modulates the activity of the three transmembrane ER  
51 stress sensor proteins governing the UPR. These sensors are the kinase/nuclease IRE1, the  
52 kinase PERK, and the ER-membrane tethered transcription factor ATF6 <sup>14,15</sup>. When the cell's  
53 biosynthetic output surpasses the ER's folding capacity, unfolded proteins accumulate in the ER  
54 lumen, which licenses the activation of IRE1, PERK, and ATF6 through well-described  
55 mechanisms involving their reversible dissociation from BiP, direct activation by unfolded protein  
56 ligands, or changes in the redox status of the ER lumen. The signaling cascade downstream of  
57 the sensors culminates in the activation of gene expression programs that restore ER  
58 homeostasis (reviewed in <sup>16</sup>).

59 In virus-infected cells, BiP is upregulated by flaviviruses (Zika, ZIKV; and Dengue, DENV virus),  
60 coronaviruses (SARS-CoV-2, MERS-CoV), Hepatitis B Virus (HBV), and Human  
61 Cytomegalovirus (HCMV), a member of the betaherpesvirus subfamily <sup>17-21</sup>. Pharmacological  
62 inhibition or knockdown of BiP reduces viral replication in cultured cells (ZIKV, DENV, SARS-  
63 CoV-2, and HCMV) and mouse infection models (SARS-CoV-2), highlighting its pro-viral  
64 activity.

65 Beyond viral infection, BiP is elevated in numerous cancers, including leukemia, melanoma,  
66 multiple myeloma, brain, pancreatic, liver, and breast cancer, and is regarded as a promising  
67 biomarker and therapeutic target in several diseases <sup>22</sup>. In addition to heightened levels, BiP  
68 can re-localize to the cell surface during ER stress, which correlates with tumor aggressiveness  
69 and poor prognosis <sup>23,24</sup>. Moreover, BiP protects cancer cells from apoptosis and promotes

70 proliferation and metastasis, thereby contributing to tumor robustness and resistance to therapy  
71 <sup>22,25</sup>.

72 Motivated by these observations, we investigated the roles of BiP during infection by the  
73 oncogenic gamma-herpesvirus Kaposi's Sarcoma-Associated Herpesvirus (KSHV). KSHV is the  
74 most recently discovered human herpesvirus and the causal agent of Kaposi's sarcoma (KS),  
75 the lymphoproliferative disorders Primary Effusion Lymphoma (PEL), and KSHV-associated  
76 multicentric Castleman's disease (MCD), and is implicated in KSHV inflammatory cytokine  
77 syndrome (KICS) <sup>26,27</sup>. Few treatment options are available for these diseases, and an unmet  
78 clinical need exists for a targeted antiviral therapeutic <sup>27</sup>.

79  
80 KSHV contains a ~160Kb double-stranded DNA genome that encodes over 80 proteins <sup>28,29</sup>. As  
81 with all other herpesviruses, KSHV establishes life-long latent infections characterized by the  
82 expression of a few viral products. To complete its life cycle, KSHV reactivates from this latent  
83 state to a lytic, virion-productive infection characterized by a massive induction of viral  
84 transcripts and protein synthesis <sup>29,30</sup>. KSHV is an enveloped virus, and several of its proteins  
85 are synthesized in the ER <sup>31</sup>; therefore, KSHV infection could impose a high biosynthetic burden  
86 on this organelle.

87  
88 Here, we show that BiP is upregulated during KSHV lytic infection, independent of UPR  
89 activation, and acts as a pro-viral factor for multiple types of DNA viruses (herpes and  
90 poxviruses), underscoring that inhibiting BiP may provide broad-spectrum antiviral utility.  
91 Moreover, we report that BiP inhibition with the thiazole benzenesulfonamide HA15 has strong  
92 cytostatic and cytotoxic effects in KSHV-infected B-cells and primary endothelial cells but not in  
93 uninfected cells, supporting the notion that BiP inhibition is a promising therapeutic alternative  
94 for KSHV-associated malignancies.

95

## 96 **Results**

97

### 98 **BiP is upregulated during the lytic cycle of KSHV.**

99 KSHV encodes at least 14 transmembrane or secreted proteins with functions in cell entry, viral  
100 gene expression, and immune evasion (Table 1). These viral proteins are folded, processed,  
101 and assembled in the ER with the assistance of cellular chaperones. To investigate the role of  
102 BiP during the lytic cycle of KSHV, we used the well-established iSLK.219 model system to  
103 study KSHV reactivation<sup>32</sup>. iSLK.219 cells are latently infected with KSHV and contain a  
104 doxycycline (Dox)-inducible viral transcription factor RTA (replication  
105 and transcriptional activator), the expression of which is sufficient to induce entry to the KSHV's  
106 lytic cycle (Fig. 1A). iSLK.219s harbor KSHV.219, a recombinant virus that encodes a  
107 constitutive GFP reporter and an RTA-inducible RFP reporter in the viral genome that facilitates  
108 monitoring infection and viral reactivation (Sup. Fig. 1A-B)<sup>33</sup>. We induced iSLK.219 cells with  
109 Dox and collected cell lysates at 0h, 24h, 48h, and 72h, representing the latent (0h), early-lytic  
110 (24h-48h), and late-lytic (48h-72h) stages of infection, and monitored the levels of BiP by  
111 immunoblot throughout a time course of reactivation (Fig. 1B). Protein levels of BiP significantly  
112 increased early in the lytic cycle of KSHV, starting at 24h post-reactivation, and coincide with an  
113 upsurge in viral protein expression (Fig. 1B and Sup. Fig. 1B). To determine the timing of BiP  
114 upregulation during the lytic cycle, we used the viral DNA replication inhibitor phosphonoformate  
115 (PFA), which arrests infection in the early stages of the lytic cycle by preventing viral DNA  
116 replication<sup>34</sup>. The levels of BiP in iSLK.219 cells induced with Dox for 72h were  
117 indistinguishable in PFA-treated from untreated cells, indicating that the upregulation of BiP is  
118 an early event in the viral lytic cycle that is independent of late viral gene expression (Fig. 1C).  
119 Notably, we did not detect any changes in the levels of GRP94 or Calreticulin—two prominent

120 ER chaperones—during the lytic cycle of KSHV, suggesting that the upregulation of BiP during  
121 infection is not general to all ER chaperones (Fig. 1D).

122

123 **BiP upregulation during the early-lytic cycle of KSHV is independent of the UPR.**

124 BiP transcription is rapidly upregulated by the UPR transcription factors XBP1s and ATF6 in  
125 response to ER stress to allow homeostatic readjustment<sup>13,35</sup>. qRT-PCR analysis revealed that  
126 KSHV lytic infection did not coincide with an increase in BiP mRNA levels (Fig. 1E), suggesting  
127 that the upregulation of the BiP protein we observed was post-transcriptional and likely  
128 independent of UPR induction during infection. Previous reports indicate that KSHV modulates  
129 the UPR in PEL-derived cells by disrupting the signal transduction downstream of the UPR  
130 sensors IRE1, PERK, and ATF6<sup>36</sup>. To determine whether the UPR is dysregulated during  
131 KSHV infection in iSLK.219 cells, we first evaluated the levels, phosphorylation status, and  
132 activity of IRE1 during viral reactivation (Sup. Fig. 2A). Phosphorylated IRE1 (IRE1-P) levels  
133 increased as the lytic cycle progressed. Despite the evident activation of IRE1 during the lytic  
134 cycle of KSHV, we observed a minimal increase in XBP1 mRNA splicing (XBP1s) and XBP1s  
135 protein, a direct product of IRE1 activity, indicating disruption of canonical IRE1 signaling during  
136 lytic infection in iSLK.219 cells (Sup. Fig. 2A-C).

137

138 Even though XBP1s was barely detectable during the KSHV lytic cycle in iSLK.219 cells, we  
139 tested whether the low levels of this potent UPR transcription factor could mediate the  
140 upregulation of BiP. We used CRISPRi-mediated gene silencing of XBP1 to test this hypothesis  
141 (Sup. Fig. 2D)<sup>37</sup> and found that the knockdown of XBP1 did not significantly impact BiP protein  
142 levels or viral production in iSLK.219 cells (Sup. Fig. 2D, 2E). We also investigated whether  
143 ATF6 was responsible for the upregulation of BiP observed during KSHV lytic infection. To this  
144 end, we knocked down ATF6 or treated iSLK.219 cells with the ATF6 inhibitor CeapinA7, a  
145 small molecule that blocks ATF6 ER export and its subsequent proteolytic processing and

146 activation<sup>38</sup>. Neither CeapinA7 treatment nor ATF6 knockdown by CRISPRi affected the  
147 accumulation of BiP protein or the production of infectious virus in iSLK.219 cells undergoing  
148 KSHV lytic infection (Sup. Fig. 2F-H). These findings establish that KSHV reactivation exerts  
149 UPR-independent, post-transcriptional BiP protein upregulation in these cells (Sup. Fig. 2D, 2F-  
150 G).

151

### 152 **BiP is a pro-viral factor in KSHV-infected cells.**

153 The upregulation of BiP protein during KSHV lytic infection in iSLK.219 cells is remarkable given  
154 the substantial host shutoff mediated by the KSHV SOX (shutoff and exonuclease) protein,  
155 which degrades host mRNAs. This viral factor suppresses the expression of host proteins to  
156 funnel host cell resources towards the pathogen's benefit<sup>39</sup>. Because this result suggests BiP  
157 effectively escapes host shutoff in iSLK.219 cells, we tested whether KSHV exploits BiP during  
158 its lytic cycle. To this end, we used HA15, a thiazole benzenesulfonamide inhibitor of BiP that  
159 targets its ATPase domain<sup>40</sup>. Treatment of iSLK.219 cells with HA15 had a striking effect on  
160 KSHV reactivation by reducing lytic protein expression and decreasing infectious virus  
161 production by up to 90% (Fig. 2A-B). In an orthogonal approach, we silenced BiP expression by  
162 siRNA-mediated knockdown. BiP's genetic depletion phenocopied HA15 treatment and  
163 significantly reduced viral protein expression and infectious virus production (Fig. 2C-D), thus  
164 corroborating that BiP is essential for KSHV replication in these cells. To determine if the  
165 observed effect of HA15 was restricted to iSLK.219 cells, we investigated its impact on the  
166 inducible B-cell lymphoma-derived cell line TReX-BCBL1-RTA, which is also latently infected  
167 with KSHV and expresses RTA under the control of a doxycycline-inducible promoter<sup>41</sup>.  
168 Interestingly, in TReX-BCBL-1 cells, we did not detect an upsurge in BiP protein levels during  
169 the KSHV lytic cycle (Sup. Fig. 3). Despite this observation, treatment of TReX-BCBL-1-RTA  
170 cells with HA15 during a time course of lytic reactivation with Dox reduced viral protein  
171 expression and viral DNA replication comparable to the effect observed in iSLK.219s treated

172 with HA15 (Fig. 2E-F). These observations confirm that BiP is a pro-viral factor during KSHV  
173 infection in multiple infection models and cell types.

174

### 175 **BiP inhibition disrupts the early stages of the KSHV lytic cycle.**

176 Our observations suggested that blocking BiP function disrupts the KSHV lytic cycle at early  
177 stages post reactivation. To test this hypothesis, we analyzed viral transcriptomes collected by  
178 RNAseq at 72h post reactivation to determine the impact of BiP inhibition/depletion on viral  
179 gene expression at a genome-wide level (Fig. 3A-B). As anticipated, we observed a global  
180 reduction in viral transcript levels during the lytic cycle of HA15-treated cells, except for the K2  
181 transcript (encoding vIL6, the viral homolog of interleukin 6) and its overlapping transcript ORF2  
182 (encoding a viral dihydrofolate reductase), both of which increase at 72h post reactivation in  
183 HA15-treated cells compared to untreated cells (Fig. 3A)<sup>29,42</sup>. Previous reports have found  
184 XBP1s can bind to the promoter of vIL6 in KSHV-infected cells to induce its expression<sup>43</sup>.  
185 Considering that BiP inhibition by HA15 can cause ER stress and UPR activation, we measured  
186 the protein levels of XBP1s in a time course of reactivation in the presence of HA15. In these  
187 conditions, we could not detect the expression of XBP1s protein in HA15-treated iSLK.219 cells,  
188 suggesting that additional factors may compensate for upregulating vIL6 (Sup. Fig. 4).

189

190 Given the essential role of BiP for folding and processing newly synthesized proteins in the ER,  
191 we hypothesized that HA15 treatment could disrupt the lytic cycle by affecting the function of  
192 viral glycoproteins expressed early after reactivation (Table 1). We focused on K1, a KSHV  
193 glycoprotein expressed during the latent and lytic cycles of infection, which is required for  
194 efficient lytic reactivation<sup>44,45</sup>. We evaluated the levels of K1 by immunoblot in TReX-BCBL-1-  
195 RTA cells and observed an increase in the levels of this protein as the lytic cycle progressed, in  
196 agreement with previous findings<sup>45</sup> (Fig. 3C). We see that the levels of K1 are generally lower  
197 in latent and lytic cells treated with HA15, which may negatively impact the progress of the lytic



198 cycle thus suggesting that BiP inhibition could disrupt the KSHV lytic cycle in part by modulating  
199 K1 levels.

200

### 201 **HA15 is a broad-spectrum inhibitor of herpes- and poxvirus replication.**

202 BiP inhibition with HA15 has been shown as a potential antiviral strategy for RNA viruses,  
203 including alphaviruses and, more recently, coronaviruses<sup>19,46</sup>. Our results indicate that this  
204 compound is also active against KSHV. These observations raised the possibility that HA15  
205 may provide antiviral utility against other dsDNA viruses. To test this hypothesis, we evaluated  
206 the potential of HA15 to inhibit viral replication in primary human fibroblasts (NHDFs) infected  
207 with three different dsDNA viruses: an alphaherpesvirus, Herpes Simplex Virus-1 (HSV-1), a  
208 betaherpesvirus, Human Cytomegalovirus (HCMV), and a poxvirus, Vaccinia Virus (VV). Cells  
209 were infected at a low multiplicity of infection (MOI) in the presence or absence of HA15. The  
210 spread of infection at different times post-infection was determined by measuring the expression  
211 of virus-encoded GFP in HSV-1-GFP and HCMV-GFP infected cells or by immunofluorescence  
212 using a polyclonal antibody against vaccinia virus<sup>47-49</sup>. Our experiments revealed potent  
213 inhibition of viral spread for HSV-1-GFP, HCMV-GFP, and VV in the presence of 10-30  $\mu$ M  
214 HA15, indicating that HA15 acts as a broad-spectrum inhibitor of dsDNA viruses (Fig. 4A).  
215 Notably, HA15 treatment of NHDFs was not cytotoxic even at high concentrations (30  $\mu$ M) or  
216 long treatment times (1 or 6 days) (Fig. 4B), further substantiating that blocking BiP is a  
217 promising antiviral strategy with a minimal negative impact on normal cells.

218

### 219 **Treatment with HA15 is cytostatic for KSHV-infected lymphoma-derived B-cells**

220 In addition to its antiviral activity, HA15 has shown promising anticancer activity<sup>40,50</sup>. To test  
221 whether this compound has a similar anticancer effect in KSHV-related lymphomas, we  
222 evaluated the impact of escalating doses of HA15 on the viability of three cell lines derived from  
223 primary effusion lymphoma, TReX-BCBL-1-RTA, and the BC-1 and BC-2 cell lines that are co-

224 infected with KSHV and EBV (Epstein Barr Virus) (Fig. 5A-B, Sup. Fig. 5A-D). At 72h post-  
225 treatment, we observed a dose-dependent reduction in cell numbers for these cancer cell lines.  
226 Even as the total cell numbers were lower in HA15 treatment, the viability of treated cells  
227 remained essentially unchanged in all three cell lines at HA15 concentrations  $\leq 10 \mu\text{M}$ . The  
228 highest HA15 concentration we tested ( $50\mu\text{M}$ ) resulted in profound cell cytotoxicity measured by  
229 trypan blue exclusion (Fig. 5A-B, Sup. Fig. 5A-D). These observations suggest HA15 ( $1\text{-}10\mu\text{M}$ )  
230 has a strong cytostatic effect in B-cells derived from primary effusion lymphoma and is cytotoxic  
231 to cancer cells at high concentrations. Finally, to test whether these HA15 effects are specific to  
232 cancer cells, we treated non-transformed normal peripheral primary B cells (PPBCs) with  
233 increasing doses of HA15. These experiments revealed no significant changes in the total  
234 number of viable cells compared to untreated cells, even at the highest concentration tested  
235 ( $50\mu\text{M}$ ), indicating that HA15 is neither cytostatic nor cytotoxic for normal B-cells (Fig. 5C-D).

236

### 237 **Treatment with HA15 is cytotoxic for KSHV-infected primary lymphatic endothelial cells.**

238 The main cellular targets of KSHV in KS lesions are spindle cells thought to originate from  
239 lymphatic endothelial cells (LECs)<sup>51,52</sup>. We used primary LECs as a model for KSHV infection to  
240 study the effects of BiP inhibition in a context relevant to the pathophysiology of KS. In this  
241 model, we infected LECs with the recombinant KSHV.219 virus, which harbors a puromycin  
242 resistance cassette, a constitutive GFP reporter, and an RTA inducible RFP reporter<sup>33,53</sup>. At 14  
243 days post-infection and following puromycin selection (started 48h after infection), KSHV-  
244 infected LECs (KLECs.219) expressed GFP and showed the typical spindle cell morphology  
245 that is characteristic of KS lesions, corroborating KSHV infection (Fig. 6C top middle and left  
246 panels). As previously reported, a small fraction of KLECs.219 expressed RFP (data not  
247 shown), indicating spontaneous lytic reactivation in cell culture<sup>53</sup>. In line with our findings in  
248 iSLK.219 cells, we observed the upregulation of BiP in KLECs.219 at 14 days post-infection,  
249 possibly driven by the expression of lytic genes in a subset of the population (Fig. 6A).

250 Treatment of uninfected LECs with 10  $\mu$ M HA15 for up to 72 h did not substantially affect cell  
251 morphology or viability (Fig. 6B-C). Remarkably and in stark contrast to uninfected LECs,  
252 treating KLECs.219 with 10 $\mu$ M HA15 for 72h induced significant cell death (Fig. 6B-C), with  
253 evident cytotoxicity as early as 48h post-treatment.

254

## 255 **Discussion**

256

257 BiP is a pivotal component of the proteostasis network and a pro-viral factor; therefore, it  
258 emerges as a potential target for antiviral intervention. Our study uncovered the dysregulation  
259 and requirement for BiP during lytic infection by the oncogenic herpesvirus KSHV. Furthermore,  
260 we showed that the BiP inhibitor HA15 had a broad-spectrum antiviral activity for dsDNA viruses  
261 (herpesviruses and poxviruses) and caused cytostasis/cytotoxicity in KSHV-infected PEL and  
262 LEC cells, highlighting its potential use as an anticancer agent during viral-induced  
263 oncogenesis.

264

265 The cellular response to ER proteostatic insults is orchestrated by the UPR, wherein BiP  
266 upregulation is mainly transcriptionally driven by the UPR transcription factors XBP1s and ATF6  
267 <sup>54</sup>. In KSHV-infected iSLK.219 cells, BiP escaped UPR regulatory control and was upregulated  
268 post-transcriptionally during lytic infection. Viral infections, including KSHV, induce the  
269 integrated stress response (ISR), which has, as a principal outcome, the downregulation of  
270 global protein synthesis <sup>55</sup>. In these conditions, cap-dependent translation is disfavored. Thus,  
271 the enhanced BiP protein synthesis we observed may arise from alternative initiation  
272 mechanisms such as the one afforded by the IRES element in the BiP mRNA <sup>56,57</sup>. Indeed,  
273 several stresses negatively impact cap-dependent translation to favor the expression of IRES-  
274 containing transcripts <sup>58</sup>. Another possibility is that the translation initiation factor eIF2A, not to  
275 be confused with eIF2 $\alpha$ , promotes the translation of BiP during KSHV infection, as reported

276 in other stress conditions <sup>59</sup>. In this scenario, eIF2A would facilitate translation initiation at non-  
277 canonical start codons in situations in which eIF2alpha is phosphorylated (i.e., during ISR  
278 activation), and the availability of the eIF2-Met-tRNAi-GTP ternary complex, which is required  
279 for cap-dependent translation initiation at cognate AUG start codons, is limiting. Whether these  
280 mechanisms—IRES- or eIF2A-mediated translation initiation—promote the BiP protein  
281 upregulation we observed remains to be determined. Nonetheless, the enhanced translation of  
282 upstream open reading frames and non-canonical start codons reported during the KSHV lytic  
283 cycle suggests an altered translational state that could account for the molecular phenotypes we  
284 observed <sup>29</sup>.

285  
286 The upregulation of BiP and its pro-viral activity extend beyond KSHV-inherent biology. Indeed,  
287 both BiP upregulation and pro-viral roles have been reported in corona-, flavi-, alphaherpes-,  
288 and beta herpesviruses <sup>11,19,46,60,61</sup>. All these viruses are enveloped; therefore, they rely on the  
289 host's machinery to acquire membranes and synthesize and correctly fold viral glycoproteins or  
290 secreted viral peptides<sup>2</sup>. In all the viruses mentioned above, BiP has been shown to participate  
291 in several steps in the viral cycle, attesting to its essential role in aiding the correct biosynthesis  
292 and assembly of proteins during virion production.

293  
294 In cells infected with the alphavirus VEEV, the flaviviruses DENV or JEV, and the herpesvirus  
295 HCMV, genetically or pharmacologically blocking BiP does not impact viral genome replication  
296 but significantly reduces infectious virion production <sup>11,46,61</sup>. In these cases, BiP may not be  
297 required for the early stages of the viral life cycle but for virion assembly. However, unlike the  
298 above observations on HCMV, VEEV, DENV, and JEV-infected cells, in KSHV-infected  
299 iSLK.219 and TREx-BCBL-1 cells, BiP inhibition results in a blockage of infection at early stages  
300 during reactivation of the lytic cycle before genome replication. This notion is substantiated by  
301 the lower levels of the early-lytic K1 viral glycoprotein we observed in lytic TREx-BCBL-1 cells

302 treated with HA15. Studies by the Damania Lab have shown that the expression of K1 is  
303 required for efficient KSHV replication <sup>45</sup>, which is further supported by the global  
304 downregulation of viral gene expression, measured by RNASeq, that we observed in HA15-  
305 treated cells. Whether additional early-lytic proteins or host factors contribute to the  
306 downregulation of lytic reactivation in cells where BiP is no longer active remains to be  
307 determined.

308

309 While BiP was required for the efficient replication of KSHV in iSLK.219 epithelial cells and PEL-  
310 derived TReX-BCBL-1 cells, we noted that the levels of BiP did not increase in PEL-derived  
311 cells during the lytic cycle. The virus strains present in these cell lines (iSLK.219 Accession  
312 number GQ994935.1 and TReX-BCBL-1 Accession number HQ404500.1) are greater than 99%  
313 similar at the nucleotide sequence level (data not shown), suggesting that the disparate  
314 responses we observed likely stem from cell-intrinsic factors. PEL-derived cells show a gene  
315 expression profile resembling malignant plasma cells, including a higher expression of the UPR  
316 effector XBP1s, and, indeed, higher levels of XBP1s have been observed during the KSHV lytic  
317 cycle in TReX-BCBL-1 cells than those observed in iSLK.219 cells <sup>36,62</sup>. The unique gene  
318 expression profile of PEL-derived cells may indicate profound reconfiguration of the machinery  
319 required for maintaining ER homeostasis in cells with a high secretory burden, as occurs in  
320 plasma cells <sup>62,63</sup>. As such, in TReX-BCBL-1 cells the capacity of the ER may be sufficient to  
321 accommodate KSHV protein folding during the lytic cycle without a need to induce signal  
322 transduction programs to increase BiP levels. Future studies comparing the basal levels of BiP  
323 and other UPR factors in KSHV-infected B- and epithelial cells, as well as the identity and  
324 dynamics of BiP client proteins during the viral lytic cycle, will shed light on the inherent ER-  
325 protein folding capacity of different KSHV-infected cell types.

326

327 Our observations align with the cytoprotective role of BiP, particularly under stress conditions. In  
328 line with a maladaptive dependency on BiP in cancer cells, blocking BiP in KSHV-infected PEL  
329 and LEC-derived cells resulted in cytostatic and cytotoxic responses, respectively. Indeed, BiP  
330 levels are associated with cell division and increased proliferation rates in numerous tumor  
331 models<sup>22,64</sup>. One mechanism by which BiP may confer a maladaptive survival advantage is  
332 through modulation of cell proliferation by tuning Wnt/B-catenin signaling, wherein BiP-Wnt  
333 interactions promote Wnt's correct posttranslational processing to promote downstream  
334 signaling<sup>65</sup>. In PEL cells, the Wnt/B-catenin signaling pathway is usurped by KSHV, and the  
335 latency-associated nuclear antigen (LANA), expressed in all KSHV-latently infected cells,  
336 arrests GSK3 in the nucleus and promotes the stabilization and accumulation of B-catenin,  
337 enabling the entry of infected cells into S-phase<sup>66</sup>. Future experiments to evaluate the integrity  
338 of the Wnt/B-catenin signaling pathway in HA15-treated PEL cells will help clarify the  
339 contributions of BiP to changes in the proliferation capacity of these lymphoma-derived cells.

340

341 In contrast to PEL-derived cells, viral infection in KLECs.219 cells led to the upregulation of BiP  
342 and the strict dependence on BiP for cell survival. In other cancers, BiP inhibition leads to a  
343 hyperactive UPR, activating apoptosis and autophagy. Detailed mapping of host gene  
344 expression and proteome profiles following KSHV infection of LECs and treatment with HA15  
345 will help determine which factors induced upon infection drive terminal responses in KLECs.219  
346 cells.

347

348 One of the most exciting observations from our studies is the broad-spectrum antiviral activity of  
349 HA15 against both herpes- and poxviruses. Our results substantiate the potential therapeutic  
350 application of inhibiting BiP in cells infected by enveloped viruses from unrelated families. A  
351 primary concern when targeting host factors for therapeutic antiviral intervention is the potential  
352 for cytotoxicity. This concern is paramount when targeting BiP, which is critical for overall cell

353 homeostasis<sup>13,35</sup>. However, our results support the notion that BiP inhibition might be  
354 tolerable—we observed minimal cytotoxicity in three primary uninfected cell lines, including  
355 peripheral B-cells, lymphatic endothelial cells, and normal human dermal fibroblasts, at  
356 concentrations higher than those used to block viral replication. Moreover, *in vivo* studies have  
357 shown that BiP haploinsufficiency in aged mice had no significant adverse effects on body  
358 weight, organ integrity, behavior, memory, cancer, inflammation, or chemotoxic response<sup>67</sup>.  
359 These observations and our results suggest that inhibiting BiP offers a promising therapeutic  
360 window for deploying broad-spectrum antivirals.

361

362

## 363 **Materials and Methods**

364

### 365 **Cell Culture and Compounds**

366 iSLK, iSLK.219, and normal human dermal fibroblasts (NHDFs/Lonza CC-2509) were grown in  
367 Dulbecco's modified Eagle medium (DMEM; Invitrogen, Carlsbad, CA, USA) supplemented with  
368 10% FBS, 200 µM of L-glutamine, and 100 U/mL of penicillin and streptomycin. iSLK.219 cells  
369 were maintained in 10 µg/mL of puromycin (Invivogen, San Diego, CA, USA). The Primary  
370 Effusion Lymphoma (PEL)-derived cells TReX-BCBL1-RTA (Jung Lab Lerner Research Institute  
371 at Cleveland Clinic), BC1 (CVCL\_1079), and BC2 (CVCL\_1856) (Manzano Lab, University of  
372 Arkansas for Medical Sciences) were grown in RPMI 1640 medium (Invitrogen, Carlsbad, CA,  
373 USA) supplemented with 10% fetal bovine serum (FBS; Invitrogen, Carlsbad, CA, USA), 200  
374 µM of L-glutamine, and 100 U/mL of penicillin/streptomycin. Primary Dermal Lymphatic  
375 endothelial cells (LECs) from PromoCell (C-12217) were maintained in EBM-2 media (Lonza  
376 00190860) supplemented with the EGM-2 MV bullet kit (CC-4147) at 37°C with a 5% CO<sub>2</sub>  
377 atmosphere. Primary Peripheral B Cells (PPBSc, STEMCELL 70023) were thawed and  
378 maintained at 100,000 cells/mL in ImmunoCult™ Human B Cell Expansion media (STEMCELL

379 100-0645) at 37 degrees Celsius in 5% CO<sub>2</sub>. Cells were allowed to grow for 7-10 days before  
380 treatment with HA15.

381

382 The following drugs were used at the concentrations noted; Thapsigargin (Tg) (Tocris 1138)  
383 100nM, Ceapin A7 (Sigma Aldrich SML2330) 6μM, HA15 (Selleckchem S8299) 1-50μM.

384

### 385 **Induction and assessment of KSHV reactivation and replication**

386 Exogenous RTA expression was induced in iSLK.219 and TREx-BCBL-1-RTA cells by  
387 treatment with 1 μg/mL of doxycycline (Fisher Scientific, Waltham, MA, USA). To prevent viral  
388 DNA replication (Fig 1C), these cells were induced with Dox in the presence of  
389 phosphonoformate (PFA) 100μM (Sigma Aldrich P6801). Viral reactivation was evaluated by  
390 microscopy detection of the PAN-RFP reporter and immunoblot for viral proteins. To determine  
391 the efficiency of KSHV DNA replication, DNA was isolated from BCBL-1-RTA at the indicated  
392 times following reactivation using the Dneasy blood and tissue kit following manufacturer  
393 guidelines (Qiagen 69581). 20ng of total DNA was used for qPCR using primers for the KSHV  
394 gene ORF57: F: 5'GGGTGGTTTGGATGAGAAGGACA3' R: 5'CGCTACCAAATATGCCACCT,  
395 and

396 Human Chromosome 11q (accession number AP002002.4) as a normalization control: F:  
397 5'TAACTGGTCTTGACTAGGGTTTCAG3' R: 5'ACCACAACAAAAGCCTTATAGTGG3'

### 398 **Viruses**

399 HSV1-US11-GFP (Patton strain) (Mohr lab, NYU School of Medicine) was propagated and  
400 titrated in Vero cells. HCMV-TB40/E-GFP (Murphy Lab SUNY) was propagated and titrated in  
401 NHDFs. Vaccinia Virus Western Reserve (ATCC VR-1354) was expanded in HeLa cells and  
402 titrated in BSC1 cells. KSHV.219 was generated from iSLK.219 cells treated with Dox 1ug/ml for  
403 72h. The supernatant from lytic cells was collected, clarified, and filtered with a 0.45 um syringe



404 filter. The virus was tittered by spinoculation (2000 rpm/2 h/Room temp) of uninfected iSLK in 6  
405 well plates. Cells were incubated for 48 h following infection, trypsinized, and collected for flow  
406 cytometry in a Sony SH800 instrument. The percentage of cells expressing eGFP was  
407 determined by flow cytometry and used to calculate the number of fluorescence forming units  
408 (ffus) in each sample.

409

### 410 **Immunoblotting and Antibodies**

411 Cells were washed and collected in 1X sample buffer (62.5 mM Tris-HCl (pH 6.8), 2% sodium  
412 dodecyl sulfate (SDS), 10% glycerol, 0.7 M b-mercaptoethanol). Samples were sonicated on ice  
413 to reduce viscosity. Cell lysates were fractionated by SDS-PAGE and transferred onto  
414 nitrocellulose membranes. Immunoblots were incubated with primary antibodies overnight at 4  
415 °C, and immunoreactive bands were detected with HRP-conjugated secondary antibodies by  
416 enhanced chemiluminescence (ThermoFisher, Waltham, MA, USA) according to the  
417 manufacturer's recommendations. All antibodies were used at a 1:1000 dilution in 3% BSA/1×  
418 TBST unless indicated. BiP (Cell Signaling Technologies 3117), Actin (1:30,000, Sigma Aldrich,  
419 St. Louis, MO, USA), GRP94 (Cell Signaling Technologies 2104), Calreticulin (Cell Signaling  
420 Technologies 2891, IRE1 (Cell Signaling Technologies 3294), IRE1-P Ser274 (Novus  
421 biotechnologies NB100-2323), XBP1s (Cell Signaling Technologies 40435), K8.1 (mAb clone  
422 19B4), vIL6 (Advanced Biotechnology 13-214-050), KbZip (SCBT sc-69797), ORF45 (SCBT sc-  
423 53883), ORF57 (SBCT sc-135746). The LANA rabbit polyclonal antibody was raised against a  
424 synthetic peptide from the acidic domain of LANA (Polson and Ganem, unpublished). The  
425 antibody for K1 (1:100) was a generous gift from the Damania Lab at The University of North  
426 Carolina at Chapel Hill.

427

### 428 **CRISPRi-mediated knockdown**

429 Synthetic DNA segments encoding the sgRNAs targeting ATF6  
430 (5'GTTAATATCTGGGACGGCGG3') or XBP1 (5'GCCGCCACGCTGGGAACCTA3') were  
431 cloned into the BlnI and BstXI restriction sites in the pLG15 (CRISPRi) vector. The positive  
432 clones were confirmed by Sanger sequencing. Vesicular stomatitis virus (VSV) pseudotyped  
433 lentiviral production followed standard protocols. Briefly, 293METR packaging cell lines were  
434 transfected with the pLG15 lentiviral vector, VSV-G plasmid (pMD2.G Addgene 12259), and  
435 pCMV delta R8.2 (Addgene 12263). At 48h post-transfection, the viral supernatant was  
436 collected, clarified by centrifugation, and filtered through a 0.45 µm filter to remove cell debris.  
437 Viral particles were concentrated 5-fold using a regenerated cellulose centrifugal filter unit with a  
438 100k MW cut-off (Amicon Ultracel 100k). The resulting lentivirus stock was used to transduce  
439 iSLK.219-dCas9-KRAB cells by spinoculation<sup>37</sup>. Transduced iSLK.219 cells were maintained in  
440 10 µg/mL of puromycin and were selected for BFP+/sgRNA+ expression by FACS in a Sony  
441 SH800 instrument. Knockdown of ATF6 and XBP1s was confirmed by qPCR or immunoblot,  
442 respectively.

443

#### 444 **Reverse Transcription PCR (RT-PCR) and Quantitative PCR (qPCR)**

445 Total cellular and viral RNA was isolated from cells using the RNAeasy Plus Mini kit (QIAGEN  
446 74134) following manufacturers' recommendations. Reverse-transcription (RT)-PCR was  
447 performed using 500-1000 ng of total RNA per RT reaction using the iScript Reverse  
448 Transcription Supermix. To remove excess genomic DNA, samples were subjected to Dnase  
449 (New England Biolabs Inc. M0303) treatment. PCR was done using as a template 1% of the  
450 resulting cDNA. For the detection of XBP1-s and XBP1-u mRNAs, we used the following primer  
451 pairs: XBP1u/s: F: 5'GGAGTTAAGACAGCGCTTGG3' R: 5'ACTGGGTCCAAGTTGTCCAG3'.  
452 Products were separated on a 3% agarose gel and quantified by scanning densitometry  
453 (ImageJ). BiP mRNA abundance changes were measured by real-time RT-PCR analysis using

454 the PowerUp SYBR Green Master Mix. All qPCR reactions were done in a C1000 Touch  
455 Thermal cycler with a CFX96 Real-Time System. Samples were normalized using 28S RNA.  
456 Primers: 28S: F: 5`AAACTCTGGTGGAGGTCCGT3` R: 5`CTTACCAAAGTGGCCCACTA3`,  
457 BiP (HSAP5): F: 5`AGTTCCAGCGTCTTTGGTTG3` R: 5`TGCAGCAGGACATCAAGTTC3`

458

#### 459 **siRNA-mediated knockdown**

460 Small interfering RNAs targeting BiP (NM\_005347) were ordered as a SMARTpool from  
461 Dharmacon (ON-TARGETplus Human HSPA5 siRNA L-008198-00-0005). The ON-  
462 TARGETplus Non-targeting Control Pool was used as a negative control (D-001810-10-05).  
463 iSLK.219 cells (2x10e5 cells/well) were transfected with 100nM of the siRNA mix using  
464 DharmaFect transfection reagent. At 24h post-silencing, cells were treated with 1 µg/mL Dox to  
465 induce viral lytic reactivation. BiP silencing was confirmed by immunoblot.

466

#### 467 **RNA sequencing and analysis**

468 Total cellular and viral RNA was isolated from iSLK.219 cells at 72h post reactivation in the  
469 presence or absence of 10µM HA15, using the RNAeasy Plus Mini kit (QIAGEN 74134)  
470 following manufacturers' recommendations, including a DNase treatment step. RNA sequencing  
471 libraries were generated using the NEBNext Ultra II RNA Library Prep Kit (New England  
472 BioLabs E7760) and sequenced using a 150bp paired-end protocol on an Illumina Novaseq  
473 6000 instrument. Following demultiplexing, the sequenced reads were analyzed using the CZ ID  
474 platform (czid.org). Samples were aligned to the human genome GRChHg38, and all remaining  
475 reads were saved as non\_host. These files were aligned to the KSHV genome GQ994935.1,  
476 and the transcripts were quantified using Salmon<sup>68</sup>. Heatmaps were generated and annotated in  
477 Prism.

478

#### 479 **Fluorescence Assay**

480 Primary normal human dermal (NHDF) cells were plated at a density of 30,000 cells per well in  
481 a 96-well plate. The following day, cells were pretreated for two hours with HA15 (DMSO final  
482 concentration 0.1%) and incubated at 37 °C. After pretreatment, NHDF cells were either mock-  
483 infected or infected with Herpes simplex virus 1 (HSV-1) US11-GFP (Patton strain) at MOI 0.01,  
484 Human cytomegalovirus (HCMV) EGFP (TB40/E strain) at MOI 0.1, or Vaccinia virus (VV)  
485 (Western Reserve strain) at MOI 0.1 and incubated for 1 h at 37 °C. After 1 h incubation, the  
486 supernatant from cells was removed and replaced with fresh DMEM and HA15. Cells were  
487 incubated at 37 °C for 24 h (HSV-1 and VV-infected cells) or 6 days (HCMV-infected cells). After  
488 respective incubation periods, the supernatant was removed and replaced with PBS. Because  
489 VV lacked a fluorescent reporter, infected cells were stained with primary antibody (Vaccinia  
490 Virus Polyclonal FITC Antibody ThermoFisher PA1-73191, 1:1000) and Hoechst 33342  
491 (1:10,000). The fluorescent signal (GFP/Hoescht) was analyzed using the SpectraMax i3x plate  
492 reader. GFP fluorescence was measured at 485/535 and Hoescht fluorescence at 350/461.

493

#### 494 **Cell Viability Assays**

495 TReX-BCBL1-RTA, BC1, and BC2 cells were seeded at a density of 30,000 cells per well in a  
496 96-well plate. The following day, cells were treated with increasing doses of HA15 (1 $\mu$ M, 5 $\mu$ M,  
497 10 $\mu$ M, and 50 $\mu$ M). At 72h hours post-treatment, 10 $\mu$ l of the cells were stained with trypan blue  
498 and counted using the countess automated cell counter (ThermoFisher) to determine the  
499 number of live cells/ml and the percent cell death.

500 LEC viability was determined using the CellTiter-Glo Luminescent Cell Viability Assay  
501 (Promega). Uninfected and KSHV-infected LECs were seeded at a density of 7,500-10,000 cells  
502 per well of a white 96-well plate. The following day, cells were treated with HA15 (10 $\mu$ M). At 72h  
503 post-treatment, the media was replaced, and an equal volume of the CellTiter-Glo reagent was

504 added to each well. The plate was incubated in the dark for 10-15 minutes before luminescence  
505 was read on a Victor<sup>3</sup>V 1420 Multilabel Counter (Perkin Elmer).

506 Primary normal human dermal (NHDF) cells were plated at a density of 30,000 cells per well in  
507 a 96-well plate. The following day, cells were treated with HA15 (DMSO final concentration  
508 0.1%) and incubated at 37 °C. At 24 h or 6 days (corresponding to the viral infection period), 50  
509 µL of supernatant was transferred to a new 96-well plate. 50 µL of CytoTox-ONE reagent was  
510 added to the plate and incubated at RT for 10 minutes. After 10 minutes, 25 µL of Stopping  
511 Reagent was added to the plate, and the plate was incubated at RT for 10 minutes. After  
512 incubation, the plate was transferred to the SpectraMax i3x plate reader, and fluorescence was  
513 read at 560/590 to determine percent cytotoxicity.

514

## 515 **Acknowledgments**

516 We thank the CZ BioHub genomics team for their help with RNA sequencing. We are grateful  
517 for the support, scientific discussions, and critical proofreading from S. Schmid, A. Kistler, and  
518 R. Aviner at CZ BioHub, San Francisco; D. Acosta-Alvear, F. Braig-Karzig and F. Zappa at Altos  
519 Labs; and Z. Aralis and D. Proctor at UCSB. This work was funded by a grant to CS by the UC  
520 Research Initiatives, Cancer Research Coordinating Committee, and an NSF Bridge to  
521 Doctorate fellowship to GN.

522

## 523 **References**

524

- 525 1. Stern-Ginossar, N., Thompson, S. R., Mathews, M. B. & Mohr, I. Translational Control in  
526 Virus-Infected Cells. *Cold Spring Harb Perspect Biol* 11, a033001 (2019).

- 527 2. Aviner, R. & Frydman, J. Proteostasis in Viral Infection: Unfolding the Complex Virus-  
528 Chaperone Interplay. *Cold Spring Harb Perspect Biol* 12, (2020).
- 529 3. Paladino, L. *et al.* The role of molecular chaperones in virus infection and implications for  
530 understanding and treating COVID-19. *Journal of Clinical Medicine* vol. 9 1–15 Preprint at  
531 <https://doi.org/10.3390/jcm9113518> (2020).
- 532 4. Zhang, X. & Yu, W. Heat shock proteins and viral infection. *Front Immunol* 13, (2022).
- 533 5. Evelyne, K. *et al.* Endoplasmic Reticulum Chaperones in Viral Infection: Therapeutic  
534 Perspectives. *Microbiology and Molecular Biology Reviews* 85, e00035-21 (2021).
- 535 6. Saibil, H. Chaperone machines for protein folding, unfolding and disaggregation. *Nature*  
536 *Reviews Molecular Cell Biology* vol. 14 630–642 Preprint at  
537 <https://doi.org/10.1038/nrm3658> (2013).
- 538 7. Hartl, F. U., Bracher, A. & Hayer-Hartl, M. Molecular chaperones in protein folding and  
539 proteostasis. *Nature* 475, 324–332 (2011).
- 540 8. Ravindran, M. S., Bagchi, P., Cunningham, C. N. & Tsai, B. Opportunistic intruders: How  
541 viruses orchestrate ER functions to infect cells. *Nature Reviews Microbiology* vol. 14  
542 407–420 Preprint at <https://doi.org/10.1038/nrmicro.2016.60> (2016).
- 543 9. Chen, S., Novick, P. & Ferro-Novick, S. ER structure and function. *Current Opinion in Cell*  
544 *Biology* vol. 25 428–433 Preprint at <https://doi.org/10.1016/j.ceb.2013.02.006> (2013).
- 545 10. Pobre, K. F. R., Poet, G. J. & Hendershot, L. M. The endoplasmic reticulum (ER)  
546 chaperone BiP is a master regulator of ER functions: Getting by with a little help from  
547 ERdj friends. *Journal of Biological Chemistry* vol. 294 2098–2108 Preprint at  
548 <https://doi.org/10.1074/jbc.REV118.002804> (2019).
- 549 11. Lewy, T. G., Grabowski, J. M. & Bloom, M. E. *BiP: Master Regulator of the Unfolded*  
550 *Protein Response and Crucial Factor in Flavivirus Biology*. *Yale Journal of Biology and*  
551 *Medicine* vol. 90 (2017).

- 552 12. Kimata, Y., Oikawa, D., Shimizu, Y., Ishiwata-Kimata, Y. & Kohno, K. A role for BiP as an  
553 adjustor for the endoplasmic reticulum stress-sensing protein Ire1. *Journal of Cell Biology*  
554 167, 445–456 (2004).
- 555 13. Lai, C. W., Aronson, D. E. & Snapp, E. L. BiP Availability Distinguishes States of  
556 Homeostasis and Stress in the Endoplasmic Reticulum of Living Cells. *Mol Biol Cell* 21,  
557 1909–1921 (2010).
- 558 14. Preissler, S. & Ron, D. Early events in the endoplasmic reticulum unfolded protein  
559 response. *Cold Spring Harb Perspect Biol* 11, (2019).
- 560 15. Walter, P. & Ron, D. *The Unfolded Protein Response: From Stress Pathway to*  
561 *Homeostatic Regulation. Science (1979) 334, (2011)*
- 562 16. Karagöz, G. E., Acosta-Alvear, D. & Walter, P. The Unfolded Protein Response:  
563 Detecting and Responding to Fluctuations in the Protein-Folding Capacity of the  
564 Endoplasmic Reticulum. *Cold Spring Harb Perspect Biol* 11, a033886 (2019).
- 565 17. Tan, Z. *et al.* ZIKV infection activates the IRE1-XBP1 and ATF6 pathways of unfolded  
566 protein response in neural cells. *J Neuroinflammation* 15, (2018).
- 567 18. Wati, S. *et al.* Dengue Virus Infection Induces Upregulation of GRP78, Which Acts To  
568 Chaperone Viral Antigen Production. *J Virol* 83, 12871–12880 (2009).
- 569 19. Shin, W. J., Ha, D. P., Machida, K. & Lee, A. S. The stress-inducible ER chaperone  
570 GRP78/BiP is upregulated during SARS-CoV-2 infection and acts as a pro-viral protein.  
571 *Nature Communications* vol. 13 Preprint at <https://doi.org/10.1038/s41467-022-34065-3>  
572 (2022).
- 573 20. Shu, W. *et al.* Regulation of Molecular Chaperone GRP78 by Hepatitis B Virus: Control of  
574 Viral Replication and Cell Survival. *Mol Cell Biol* 40, (2020).
- 575 21. Buchkovich, N. J., Yu, Y., Pierciey, F. J. & Alwine, J. C. Human Cytomegalovirus Induces  
576 the Endoplasmic Reticulum Chaperone BiP through Increased Transcription and

- 577           Activation of Translation by Using the BiP Internal Ribosome Entry Site. *J Virol* 84,  
578           11479–11486 (2010).
- 579   22.   Lee, A. S. Glucose-regulated proteins in cancer: molecular mechanisms and therapeutic  
580           potential. *Nat Rev Cancer* 14, 263–276 (2014).
- 581   23.   Ronco, C., Rocchi, S. & Benhida, R. Expression level of GRP78/BiP as a predictor of  
582           favorable or unfavorable outcomes in cancer patients. *Mediastinum* 2, 26–26 (2018).
- 583   24.   Li, T. *et al.* New progresses on cell surface protein HSPA5/BiP/GRP78 in cancers and  
584           COVID-19. *Front Immunol* 14, (2023).
- 585   25.   Roller, C. & Maddalo, D. The molecular chaperone GRP78/BiP in the development of  
586           chemoresistance: Mechanism and possible treatment. *Frontiers in Pharmacology* vol. 4  
587           FEB Preprint at <https://doi.org/10.3389/fphar.2013.00010> (2013).
- 588   26.   Gaglia, M. M. Kaposi's sarcoma-associated herpesvirus at 27. *Tumour Virus Research*  
589           vol. 12 Preprint at <https://doi.org/10.1016/j.tvr.2021.200223> (2021).
- 590   27.   Cesarman, E., Chadburn, A. & Rubinstein, P. G. KSHV/HHV8-mediated hematologic  
591           diseases. *Blood* 139, 1013–1025 (2022).
- 592   28.   Purushothaman, P., Dabral, P., Gupta, N., Sarkar, R. & Verma, S. C. KSHV genome  
593           replication and maintenance. *Frontiers in Microbiology* vol. 7 Preprint at  
594           <https://doi.org/10.3389/fmicb.2016.00054> (2016).
- 595   29.   Arias, C. *et al.* KSHV 2.0: A Comprehensive Annotation of the Kaposi's Sarcoma-  
596           Associated Herpesvirus Genome Using Next-Generation Sequencing Reveals Novel  
597           Genomic and Functional Features. *PLoS Pathog* 10, e1003847 (2014).
- 598   30.   Purushothaman, P., Uppal, T. & Verma, S. C. Molecular biology of KSHV lytic  
599           reactivation. *Viruses* vol. 7 116–153 Preprint at <https://doi.org/10.3390/v7010116> (2015).
- 600   31.   Schlesinger, M. *et al.* Glucose and mannose analogs inhibit KSHV replication by blocking  
601           N-glycosylation and inducing the unfolded protein response. *J Med Virol* 95, (2023).



- 602 32. Myoung, J. & Ganem, D. Generation of a doxycycline-inducible KSHV producer cell line  
603 of endothelial origin: Maintenance of tight latency with efficient reactivation upon  
604 induction. *J Virol Methods* 174, 12–21 (2011).
- 605 33. Vieira, J. & O’Hearn, P. M. Use of the red fluorescent protein as a marker of Kaposi’s  
606 sarcoma-associated herpesvirus lytic gene expression. *Virology* 325, 225–240 (2004).
- 607 34. Kedes, D. H. & Ganem, D. *Sensitivity of Kaposi’s Sarcoma-associated Herpesvirus*  
608 *Replication to Antiviral Drugs Implications for Potential Therapy*. *J. Clin. Invest* vol. 99  
609 (1997).
- 610 35. Walter, P. *et al.* Inadequate BiP availability defines endoplasmic reticulum stress. *eLife*  
611 (2019) doi:10.7554/eLife.41168.001.
- 612 36. Johnston, B. P., Pringle, E. S. & McCormick, C. KSHV activates unfolded protein  
613 response sensors but suppresses downstream transcriptional responses to support lytic  
614 replication. *PLoS Pathog* 15, e1008185 (2019).
- 615 37. Brackett, K. *et al.* CRISPR Interference Efficiently Silences Latent and Lytic Viral Genes  
616 in Kaposi’s Sarcoma-Associated Herpesvirus-Infected Cells. *Viruses* 13, (2021).
- 617 38. Torres, S. E. *et al.* Ceapins block the unfolded protein response sensor ATF6a by  
618 inducing a neomorphic inter-organelle tether. *eLife* (2019) doi:10.7554/eLife.46595.001.
- 619 39. Glaunsinger, B., Chavez, L. & Ganem, D. The Exonuclease and Host Shutoff Functions  
620 of the SOX Protein of Kaposi’s Sarcoma-Associated Herpesvirus Are Genetically  
621 Separable. *J Virol* 79, 7396–7401 (2005).
- 622 40. Cerezo, M. *et al.* Compounds Triggering ER Stress Exert Anti-Melanoma Effects and  
623 Overcome BRAF Inhibitor Resistance. *Cancer Cell* 29, 805–819 (2016).
- 624 41. Nakamura, H. *et al.* Global Changes in Kaposi’s Sarcoma-Associated Virus Gene  
625 Expression Patterns following Expression of a Tetracycline-Inducible Rta Transactivator.  
626 *J Virol* 77, 4205–4220 (2003).

- 627 42. Gregory Bruce, A. *et al.* Quantitative analysis of the KSHV transcriptome following  
628 primary infection of blood and lymphatic endothelial cells. *Pathogens* 6, (2017).
- 629 43. Hu, D. *et al.* Induction of Kaposi's Sarcoma-Associated Herpesvirus-Encoded Viral  
630 Interleukin-6 by X-Box Binding Protein 1. *J Virol* 90, 368–378 (2016).
- 631 44. Wen, K. W. & Damania, B. Hsp90 and Hsp40/Erdj3 are required for the expression and  
632 anti-apoptotic function of KSHV K1. *Oncogene* 29, 3532–3544 (2010).
- 633 45. Zhigang, Z. *et al.* The K1 Protein of Kaposi's Sarcoma-Associated Herpesvirus Augments  
634 Viral Lytic Replication. *J Virol* 90, 7657–7666 (2016).
- 635 46. Barrera, M. D. *et al.* Proteomic Discovery of VEEV E2-Host Partner Interactions Identifies  
636 GRP78 Inhibitor HA15 as a Potential Therapeutic for Alphavirus Infections. *Pathogens*  
637 (2021) doi:10.3390/pathogens.
- 638 47. Benboudjema, L., Mulvey, M., Gao, Y., Pimplikar, S. W. & Mohr, I. Association of the  
639 Herpes Simplex Virus Type 1 Us11 Gene Product with the Cellular Kinesin Light-Chain-  
640 Related Protein PAT1 Results in the Redistribution of Both Polypeptides. *J Virol* 77,  
641 9192–9203 (2003).
- 642 48. Vo, M., Aguiar, A., McVoy, M. A. & Hertel, L. Cytomegalovirus strain TB40/E restrictions  
643 and adaptations to growth in ARPE-19 epithelial cells. *Microorganisms* 8, (2020).
- 644 49. Zeh, H. J. *et al.* First-in-man study of western reserve strain oncolytic vaccinia virus:  
645 Safety, systemic spread, and antitumor activity. *Molecular Therapy* 23, 202–214 (2015).
- 646 50. Wu, J., Wu, Y. & Lian, X. Targeted inhibition of GRP78 by HA15 promotes apoptosis of  
647 lung cancer cells accompanied by ER stress and autophagy. *Biol Open* 9, (2020).
- 648 51. Cancian, L., Hansen, A. & Boshoff, C. Cellular origin of Kaposi's sarcoma and Kaposi's  
649 sarcoma-associated herpesvirus-induced cell reprogramming. *Trends in Cell Biology* vol.  
650 23 421–432 Preprint at <https://doi.org/10.1016/j.tcb.2013.04.001> (2013).

- 651 52. Tuohinto, K. *et al.* KSHV infection of endothelial precursor cells with lymphatic  
652 characteristics as a novel model for translational Kaposi's sarcoma studies. *PLoS Pathog*  
653 19, (2023).
- 654 53. Chang, H. H. & Ganem, D. A unique herpesviral transcriptional program in KSHV-infected  
655 lymphatic endothelial cells leads to mTORC1 activation and rapamycin sensitivity. *Cell*  
656 *Host Microbe* 13, 429–440 (2013).
- 657 54. Yamamoto, K., Yoshida, H., Kokame, K., Kaufman, R. J. & Mori, K. Differential  
658 Contributions of ATF6 and XBP1 to the Activation of Endoplasmic Reticulum Stress-  
659 Responsive cis-Acting Elements ERSE, UPRE and ERSE-II. *The Journal of Biochemistry*  
660 136, 343–350 (2004).
- 661 55. Pakos-Zebrucka, K. *et al.* The integrated stress response. *EMBO Rep* 17, 1374–1395  
662 (2016).
- 663 56. Godet, A.-C. *et al.* IRES Trans-Acting Factors, Key Actors of the Stress Response. *Int J*  
664 *Mol Sci* 20, 924 (2019).
- 665 57. Johannes, G. & Sarnow, P. Cap-independent polysomal association of natural mRNAs  
666 encoding c-myc, BiP, and eIF4G conferred by internal ribosome entry sites. *RNA* 4,  
667 S1355838298981080 (1998).
- 668 58. Yang, Y. & Wang, Z. IRES-mediated cap-independent translation, a path leading to  
669 hidden proteome. *Journal of Molecular Cell Biology* vol. 11 911–919 Preprint at  
670 <https://doi.org/10.1093/jmcb/mjz091> (2019).
- 671 59. Starck, S. R. *et al.* Translation from the 5' untranslated region shapes the integrated  
672 stress response. *Science* (1979) 351, (2016).
- 673 60. Mao, H., Palmer, D. & Rosenthal, K. S. *Changes in BiP (GRP78) levels upon HSV-1*  
674 *infection are strain dependent.* *Virus Research* vol. 76 [www.elsevier.com](http://www.elsevier.com) (2001).

- 675 61. Buchkovich, N. J. *et al.* Human Cytomegalovirus Specifically Controls the Levels of the  
676 Endoplasmic Reticulum Chaperone BiP/GRP78, Which Is Required for Virion Assembly.  
677 *J Virol* 82, 31–39 (2008).
- 678 62. Jenner, R. G. *et al.* Kaposi's sarcoma-associated herpesvirus-infected primary effusion  
679 lymphoma has a plasma cell gene expression profile. *Proceedings of the National*  
680 *Academy of Sciences* 100, 10399–10404 (2003).
- 681 63. Ma, Y., Shimizu, Y., Mann, M. J., Jin, Y. & Hendershot, L. M. Plasma cell differentiation  
682 initiates a limited ER stress response by specifically suppressing the PERK-dependent  
683 branch of the unfolded protein response. *Cell Stress Chaperones* 15, 281–293 (2010).
- 684 64. Horibe, T. *et al.* Monitoring Bip promoter activation during cancer cell growth by  
685 bioluminescence imaging at the single-cell level. *Integr Cancer Sci Ther* 2, (2016).
- 686 65. Kitajewski, J., Mason, J. O. & Varmus, H. E. Interaction of *Wnt-1* Proteins with the  
687 Binding Protein BiP. *Mol Cell Biol* 12, 784–790 (1992).
- 688 66. Hayward, S. D., Liu, J. & Fujimuro, M. Notch and Wnt Signaling: Mimicry and  
689 Manipulation by Gamma Herpesviruses. *Science's STKE* 2006, (2006).
- 690 67. Lee, A. S. *et al.* Effects of Prolonged GRP78 Haploinsufficiency on Organ Homeostasis,  
691 Behavior, Cancer and Chemotoxic Resistance in Aged Mice. *Sci Rep* 7, (2017).
- 692 68. Patro, R., Duggal, G., Love, M. I., Irizarry, R. A. & Kingsford, C. Salmon provides fast and  
693 bias-aware quantification of transcript expression. *Nat Methods* 14, 417–419 (2017).
- 694 69. Käll, L., Krogh, A. & Sonnhammer, E. L. L. A Combined Transmembrane Topology and  
695 Signal Peptide Prediction Method. *J Mol Biol* 338, 1027–1036 (2004).
- 696 70. Teufel, F. *et al.* SignalP 6.0 predicts all five types of signal peptides using protein  
697 language models. *Nat Biotechnol* 40, 1023–1025 (2022).
- 698 71. Hiller, K., Grote, A., Scheer, M., Munch, R. & Jahn, D. PrediSi: prediction of signal  
699 peptides and their cleavage positions. *Nucleic Acids Res* 32, W375–W379 (2004).

700 72. Hallgren, J. *et al.* DeepTMHMM predicts alpha and beta transmembrane proteins using  
701 deep neural networks. *bioRxiv* 2022.04.08.487609 (2022)  
702 doi:10.1101/2022.04.08.487609.

703

704

## 705 **Figure Legends**

706

## 707 **Main Figures and Tables**

708

### 709 **Table 1: KSHV proteins containing signal peptides.**

710 The protein sequences of all annotated KSHV proteins (GQ994935.1) were analyzed with the  
711 signal sequence prediction engines Phobius<sup>69</sup>, Signal P 6.0<sup>70</sup>, and Predisi<sup>71</sup>. Signal peptides  
712 (SP) were annotated if predicted by two or more engines. The transmembrane domains of  
713 proteins containing SPs were annotated using DeepTMHMM<sup>72</sup>.

714

### 715 **Figure 1. BiP is upregulated during the KSHV lytic cycle.**

716 **(A.)** Schematic of lytic reactivation in iSLK.219 cells **(B.)** BiP is upregulated at the protein level  
717 in a time course of reactivation. (Left) iSLK.219 cells were treated with Dox (1µg/ml) to induce  
718 RTA expression and viral reactivation. Whole-cell lysates collected at the indicated times were  
719 analyzed by immunoblot. Actin: loading control. (Right) Image densitometry quantification of the  
720 immunoblot **(C.)** BiP upregulation is independent of late viral gene expression. Viral DNA  
721 replication was inhibited in iSLK.219 cells by pretreatment with PFA (100nM) for 24 hours  
722 before induction with Dox. Whole-cell lysates collected at the indicated times were analyzed by  
723 immunoblot. Actin: loading control. **(D.)** Immunoblot of GRP94, calreticulin, and actin during  
724 KSHV reactivation in iSLK.219 cells **(E.)** BiP upregulation is post-transcriptional. qRT-PCR  
725 quantification of BiP mRNA in a time course of reactivation in iSLK.219 untreated or treated with

726 Tg (100nM) for 4h. Note the high levels of BiP mRNA in cells undergoing acute ER stress.  $N=3$   
727 independent biological replicates for (B, C, D, and E). Values in (B, E) are average  $\pm$ SEM.  
728 Statistical significance in (B) was calculated using a one-way ANOVA (\* $P=0.01$ , \*\* $P=0.004$ ,  
729 \*\* $P=<0.0001$ ).

730

### 731 **Figure 2. BiP is a pro-viral factor in KSHV-infected cells.**

732 **(A-B)** BiP inhibition with HA15 disrupts the lytic cycle iSLK.219s. **(A)** Cells were treated with  
733 HA15 (10 $\mu$ M) 24h before reactivation with Dox (1 $\mu$ g/ml). At the indicated times, whole-cell  
734 lysates were collected and analyzed by immunoblot for viral proteins (Immediate early: KbZip-  
735 nuclear, ORF57-nuclear, Early: ORF45-nuclear/cytosolic, Late: K8.1-glycoprotein). Actin:  
736 loading control. **(B)** Supernatants from iSLK.219 cells treated with HA15 were collected at 72h  
737 post reactivation and used to infect naïve iSLK cells. GFP expression was determined by  
738 automated cell counting at 48h post-infection and used as a proxy for virus production. **(C-D)**  
739 Silencing of BiP reduces viral reactivation and infectious virion production. **(C)** iSLK.219 cells  
740 were reactivated with Dox, following BiP siRNA-mediated silencing for 48h. Lysates were  
741 collected at 72h post-activation and analyzed by immunoblot for viral factors. siRNA –  
742 untransfected, NT non-targeting **(D)** Supernatants from BiP-KD cells treated as in (C) were  
743 collected and processed as described in (B). **(E-F)** Inhibition of BiP blocks the lytic cycle in  
744 TReX-BCBL-1-RTA cells. **(E)** Cells were treated with HA15 (10 $\mu$ M) for 24h before induction with  
745 Dox (1 $\mu$ g/ml). At 48h post-infection, whole cell lysates were collected and analyzed by  
746 immunoblot. Actin: loading control. **(F)** Total DNA was isolated from cells treated as in (E), and  
747 viral DNA was quantified by qRT-PCR.  $N=3$  independent biological replicates. Values in (B, D,  
748 F) are average  $\pm$ SEM. Statistical significance was calculated using a paired t-test (B and D)  
749 (\* $P=0.01$ , \*\* $P=0.002$ ) or a one-way ANOVA (F) (\*\*  $P=0.0065$ )

750

### 751 **Figure 3. BiP inhibition disrupts the KSHV lytic cycle.**

752 **(A-B)**. Total RNA was isolated from latent and lytic iSLK.219 cells in the presence or absence of  
753 HA15. RNAseq libraries were prepared, sequenced, and aligned to the KSHV genome. **(A.)**  
754 (Top) Heatmap showing the Log2 of transcripts per million (TPM) for all KSHV genes ordered by  
755 genomic position in lytic iSLK.219 cells  $\pm$  HA15. (Bottom) Ratio of Log2 of TPM in HA15 vs.  
756 untreated (Unt). The dotted red line at ratio=1 denotes no change in viral gene expression in  
757 HA15-treated cells vs. untreated cells **(B.)** Boxplot of the Log2 of TPM of KSHV genes in latent  
758 and lytic iSLK.219 cells at 72h post-reactivation in the presence or absence of HA15. **(C.)** HA15  
759 treatment reduces K1 levels during the KSHV lytic cycle. (top) TReX-BCBL-1-RTA cells were  
760 treated with HA15 (10 $\mu$ M) 24h before induction with Dox (1 $\mu$ g/ml). At 48h post-infection, whole  
761 cell lysates were collected and analyzed by immunoblot. Actin: loading control. (bottom) Image  
762 quantification by gel densitometry of the K1 immunoblot.  $N=3$  independent biological replicates.  
763 Values in (C) are average  $\pm$ SD.

764

765 **Figure 4. The BiP inhibitor HA15 has a broad-spectrum antiviral effect on herpesviruses**  
766 **and poxviruses.**

767 **(A.)** Primary human fibroblasts (NHDF) were Infected at a low multiplicity of infection (MOI)  
768 (HSV-1 MOI 0.001, HCMV at MOI 0.1, and VV at MOI 0.01 in the presence or absence of HA15  
769 (10 $\mu$ M or 30 $\mu$ M). The spread of infection was determined at different times post-infection by  
770 measuring the expression of virus-encoded GFP in HSV-1-GFP and HCMV-GFP infected cells  
771 or by immunofluorescence using a polyclonal antibody against Vaccinia virus. **(B)** The effect of  
772 HA15 treatment on the viability of NDHF (1 or 6 days) and iSLK.219s (3 days) was evaluated by  
773 measuring LDH release.  $N=3$  (A),  $N=6$  (B) independent biological replicates. Values are  
774 average  $\pm$ SEM.

775

776 **Figure 5. BiP Inhibition with HA15 causes strong cytoostasis in latent PEL-derived cells.**

777 **(A-B.)** HA15 treatment differentially reduces cell numbers compared to cell viability in TReX-  
778 BCBL-1 cells. Latent TReX-BCBL-1 cells were treated with increasing concentrations of HA15  
779 (0-50  $\mu$ M) for 72 hrs. The total number of viable cells **(A.)** and the percent of dead TReX-BCBL-  
780 1 cells **(B.)** were determined by automated cell counting following trypan blue staining. **(C-D.)**  
781 HA15 treatment does not cause cytostasis nor cytotoxicity in primary B cells. Primary Peripheral  
782 B-cells were treated with increasing concentrations of HA15 (0-50  $\mu$ M) for 72 Hrs. The total  
783 number of viable cells **(C.)** and the percent of live cells **(D.)** were determined as described in (A-  
784 B). *N*=3 independent biological replicates. Values are average  $\pm$ SEM.

785

786 **Figure 6. HA15 has a cytotoxic effect on KSHV-infected LEC cells.**

787 Primary Lymphatic endothelial cells were infected with KSHV.219 and selected with puromycin  
788 for 7-14 days. **(A.)** Whole-cell lysates from uninfected (LEC) or infected (KLECs) were collected  
789 and analyzed by immunoblot. Actin: Loading control. **(B-C)** LECs and KLECs were treated with  
790 HA15 (10 $\mu$ M) for 72h. Cell viability was evaluated by ATP quantification using CellTiter-Glo **(B.)**  
791 and microscopy at 0h and 72h post-treatment **(C.)**.

792

793

794

795 **Supplementary Figures**

796

797 **Supplementary Figure 1. KSHV reactivation in iSLK.219 cells follows a cascade of gene**  
798 **expression.**

799 Latently infected iSLK.219 cells were induced to enter the lytic cycle by exogenous expression  
800 of RTA following Dox (1 $\mu$ g/ml) treatment. **(A.)** Imaging of cells at 72h post reactivation showing  
801 the expression of the lytic PAN-RFP marker in the population. **(B.)** Immunoblot for viral proteins



802 in iSLK.219 lysates collected at the indicated time points. Images are representative of 3  
803 independent biological replicates. Actin: loading control.

804

805 **Supplementary Figure 2. BiP is post-transcriptionally upregulated independently of ATF6**  
806 **and XBP1.**

807 **(A-C.)** IRE1 is phosphorylated in lytic iSLK.219 cells without detectable XBP1 splicing. Cells  
808 were reactivated by treatment with Dox (1µg/ml). At the indicated times, the cells were treated  
809 with Tg (100nM) for 4h to induce acute ER stress. **(A.)** Whole-cell lysates were collected and  
810 analyzed by immunoblot for total (IRE1) or phosphorylated IRE1 (IRE1-P), spliced XBP1  
811 (XBP1s), and actin (loading control). **(B.)** RT-PCR detection of unspliced (u) and spliced (s)  
812 XBP1 mRNA. **(C.)** Image densitometry quantification of the data in (B). **(D-H.)** XBP1 and ATF6  
813 are not required for BiP protein upregulation or infectious virus production during the KSHV lytic  
814 cycle. **(D.)** CRISPRi-based knockdown of XBP1 (XBP1-KD) in iSLK.219-dCas9 cells. Cells (NS  
815 and XBP1-KD) were induced with Dox (1µg/ml) for 24h. Cells were treated with Tg (100nM) for  
816 4h before collection. (left) Whole cell lysates were analyzed by immunoblot. Actin: loading  
817 control. **(E.)** The supernatants of cells treated as in (D) were collected and used to spinoculate  
818 uninfected iSLK cells. The percent of GFP expression was determined by automated cell  
819 counting and used as a proxy for infectious virus levels in the supernatants. **(F.)** iSLK.219 cells  
820 were treated with the ATF6 inhibitor CeapinA7 (6µM) for 2h before induction with Dox (1µg/ml).  
821 Whole-cell lysates were collected at the indicated times and analyzed by immunoblot. **(G.)**  
822 CRISPRi-based knockdown of ATF6 (ATF6KD) in iSLK.219-dCas9 cells. ATF6-KD cells were  
823 treated as in (D). **(H.)** Supernatants from ATF6-KD cells were collected and processed as  
824 described in (E). *N*=3 independent biological replicates. Values in (C, E, F) are average ±SEM.  
825 Statistical significance was calculated using a one-way ANOVA (\**P*=0.01) in (C) or a paired *t*-  
826 test (E and H).

827

828 **Supplementary Figure 3: BiP levels do not increase during the KSHV lytic cycle in TReX-**  
829 **BCBL-1 cells.**

830 TReX-BCBL-1 cells were reactivated with Dox (2 µg/ml). At 4h before collection, cells were  
831 treated with Tg (100nM) for 4h to induce acute ER stress. Whole-cell lysates were collected at  
832 the indicated times. Actin: loading control.

833

834 **Supplementary Figure 4: HA15 treatment of iSLK.219 does not induce XBP1s expression.**

835 Latent iSLK.219 cells were reactivated in the presence or absence of HA15 (10µM). Whole-cell  
836 lysates collected at the indicated times were analyzed by immunoblot using an antibody specific  
837 for XBP1s. Actin: loading control.

838

839 **Supplementary Figure 5. HA15 has a cytostatic effect on PEL-derived cells.**

840 **(A-D)** HA15 treatment causes cytostasis in BC-1 and BC-2 cells latently co-infected with KSHV  
841 and EBV. Cells were treated with increasing doses of HA15 (0-50 µM) for 72h. The total number  
842 of viable **(A.)** and the percent of dead BC-1 cells **(B.)** were determined by automated cell  
843 counting following trypan blue staining. The total number of viable **(C.)** and the percent of dead  
844 BC-2 cells **(D.)** were determined by automated cell counting following trypan blue staining. *N*=3  
845 independent biological replicates. Values are average ±SEM.

846

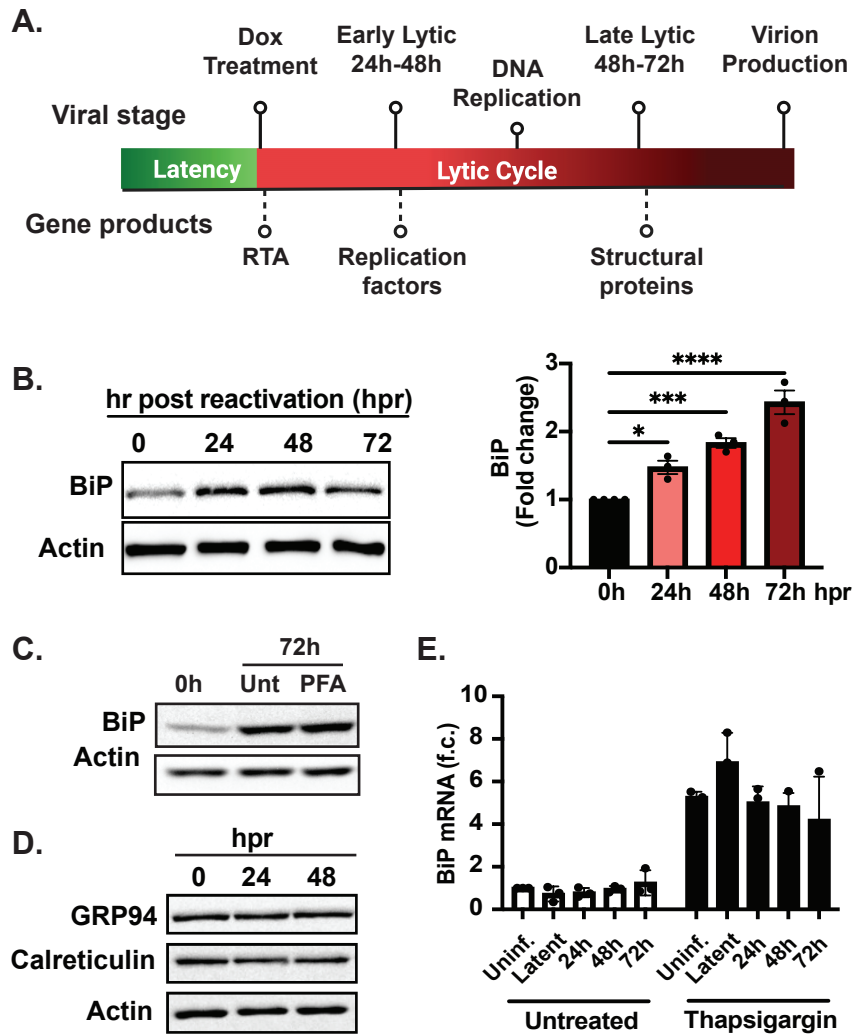

Figure 1. BiP is upregulated during the KSHV lytic cycle.

| Gene Name | Function                            | Time of Expression | Signal Peptide | Transmembrane domains                                                                               |
|-----------|-------------------------------------|--------------------|----------------|-----------------------------------------------------------------------------------------------------|
| K1        | Glycoprotein                        | Latent             | 1-18           | 224-247                                                                                             |
| ORF4      | Complement Binding Protein          | Early              | 1-19           | 533-551                                                                                             |
| ORF8      | Glycoprotein B                      | Late               | 1-26           | 743-762                                                                                             |
| K2        | Viral Interleukin 6 Homologue       | Latent             | 1-22           | N/A                                                                                                 |
| K4        | v-Macrophage Inflammatory Protein 2 | Immediate Early    | 1-25           | N/A                                                                                                 |
| K4.1      | v-Macrophage Inflammatory Protein 3 | Immediate Early    | 1-27           | N/A                                                                                                 |
| K6        | v-Macrophage Inflammatory Protein 1 | Immediate Early    | 1-24           | N/A                                                                                                 |
| ORF22     | Glycoprotein H                      | Late               | 1-21           | 715-736                                                                                             |
| ORF39     | Glycoprotein M                      | Early              | 1-29*          | 14-25, 79-103, 119-135, 153-171, 211-231, 240-260, 274-293, 307-325                                 |
| ORF47     | Glycoprotein L                      | Early              | 1-20           | N/A                                                                                                 |
| K8.1      | Glycoprotein                        | Late               | 1-26           | 200-220                                                                                             |
| ORF53     | Glycoprotein N                      | Late               | 1-23           | 79-99                                                                                               |
| K14       | Viral OX2                           | Early              | 1-24           | 230-250                                                                                             |
| K15       | LMP1/2 Homologue                    | Latent/Early       | 1-25           | 10-25, 35-50, 69-81, 91-100, 123-139, 150-167, 178-194, 207-223, 240-250, 272-287, 299-308, 329-349 |

**Table 1. KSHV proteins containing signal peptides.**

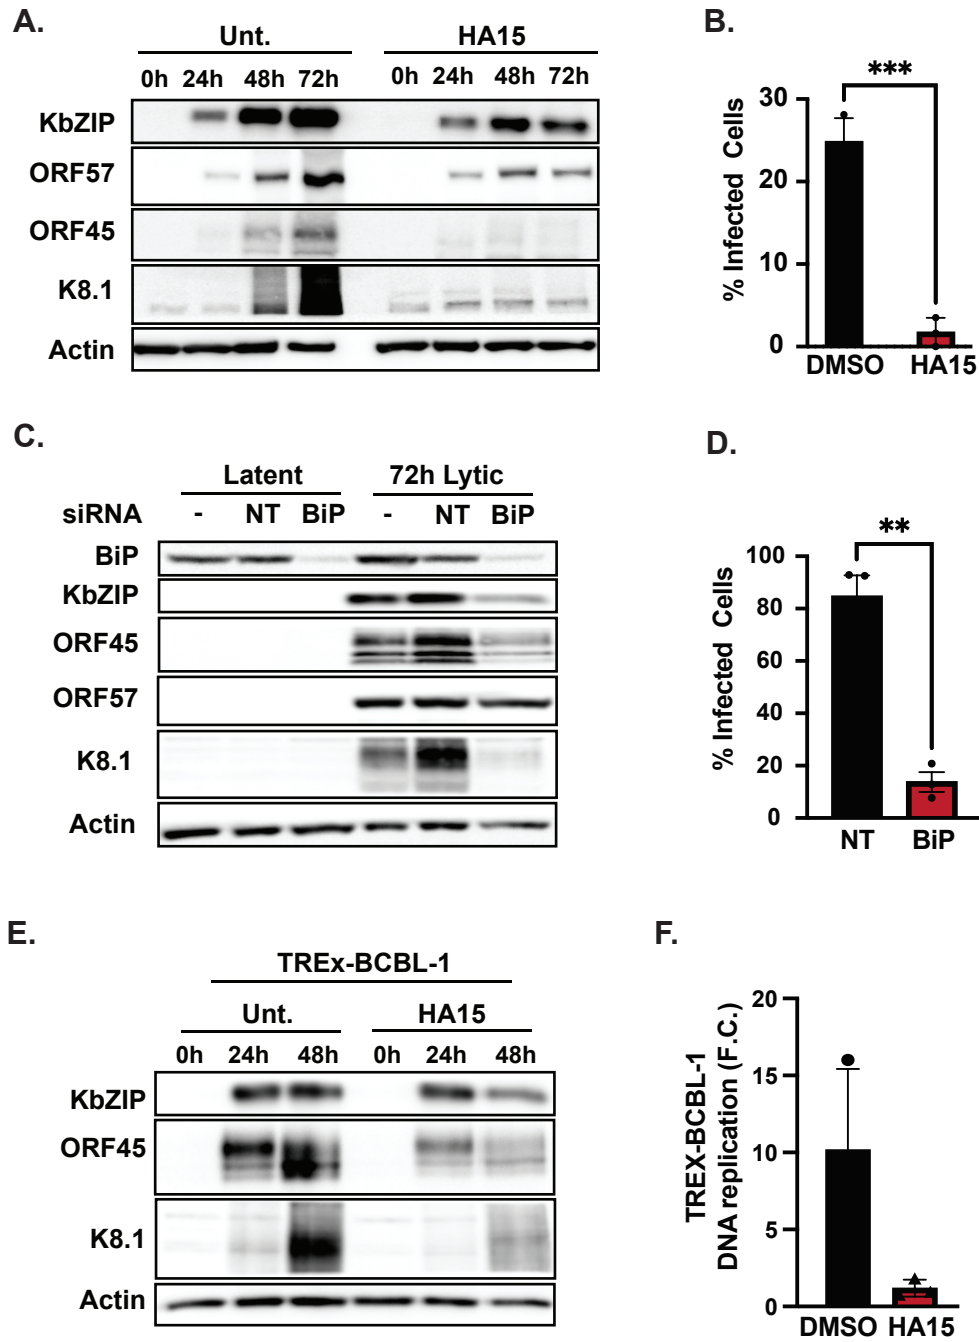

Figure 2. BiP is a pro-viral factor in KSHV-infected cells.

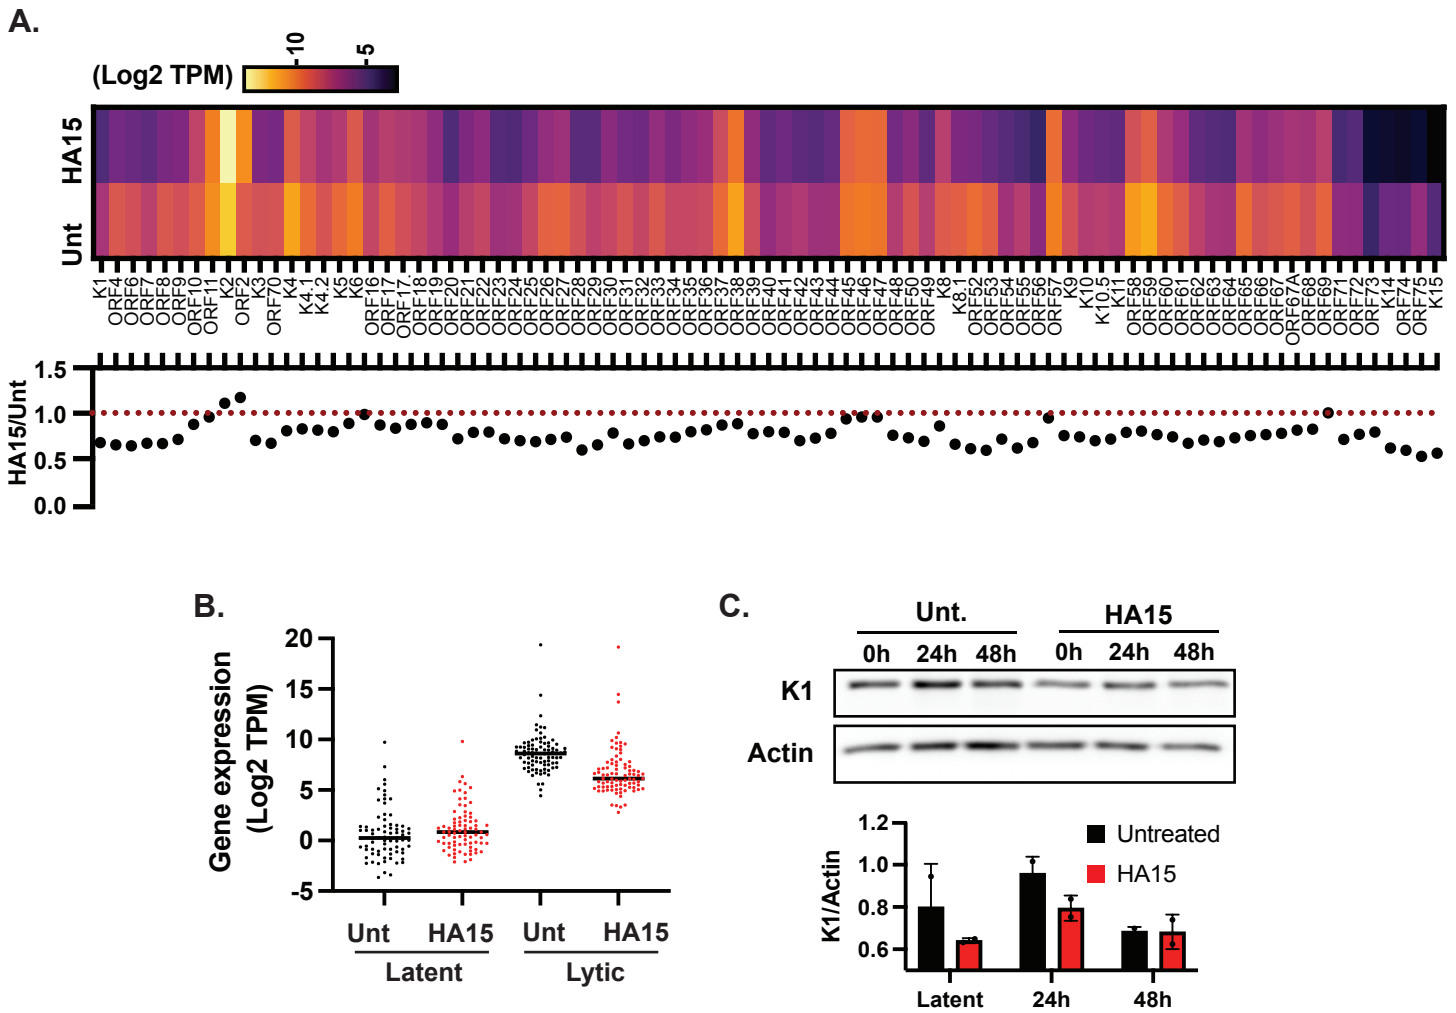

Figure 3. BiP inhibition disrupts the KSHV lytic cycle.

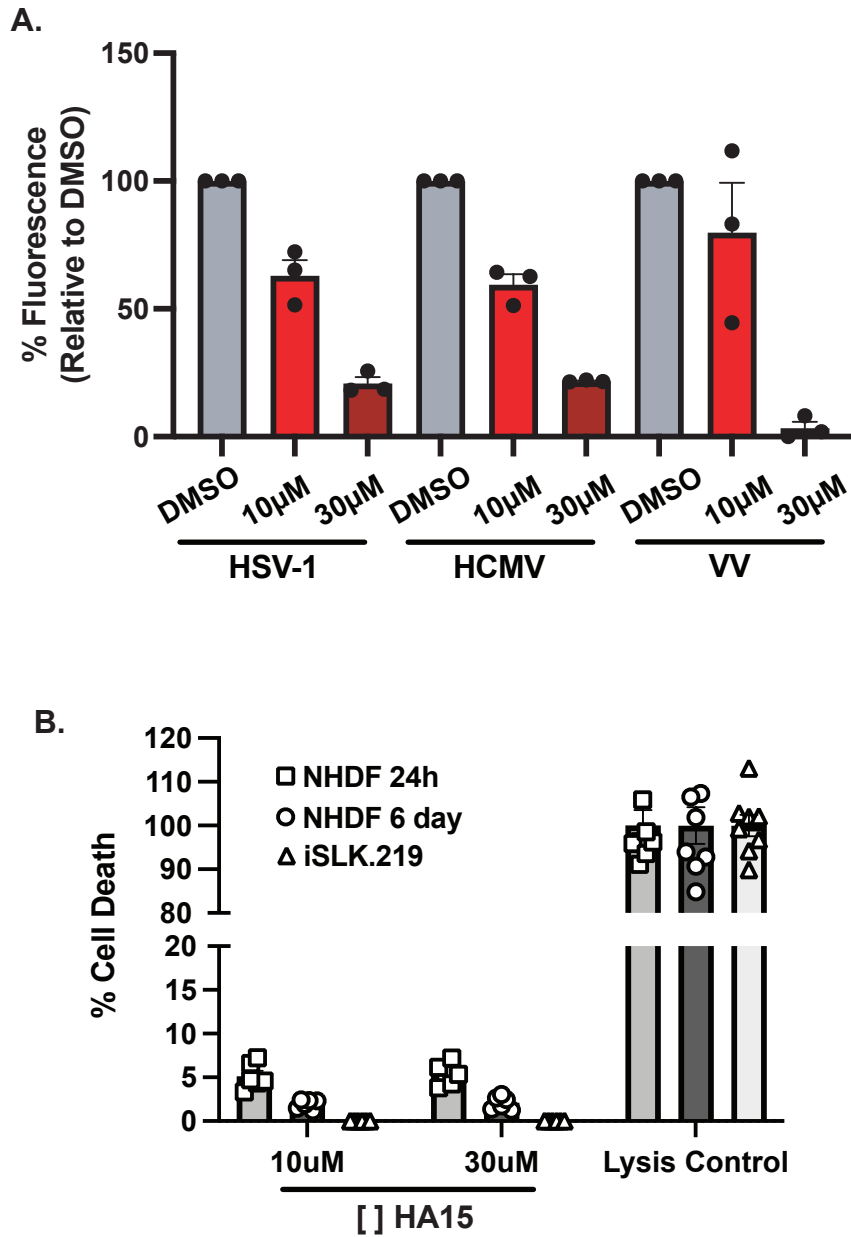

**Figure 4. The BiP inhibitor HA15 has a broad-spectrum antiviral effect on herpesviruses and poxviruses.**

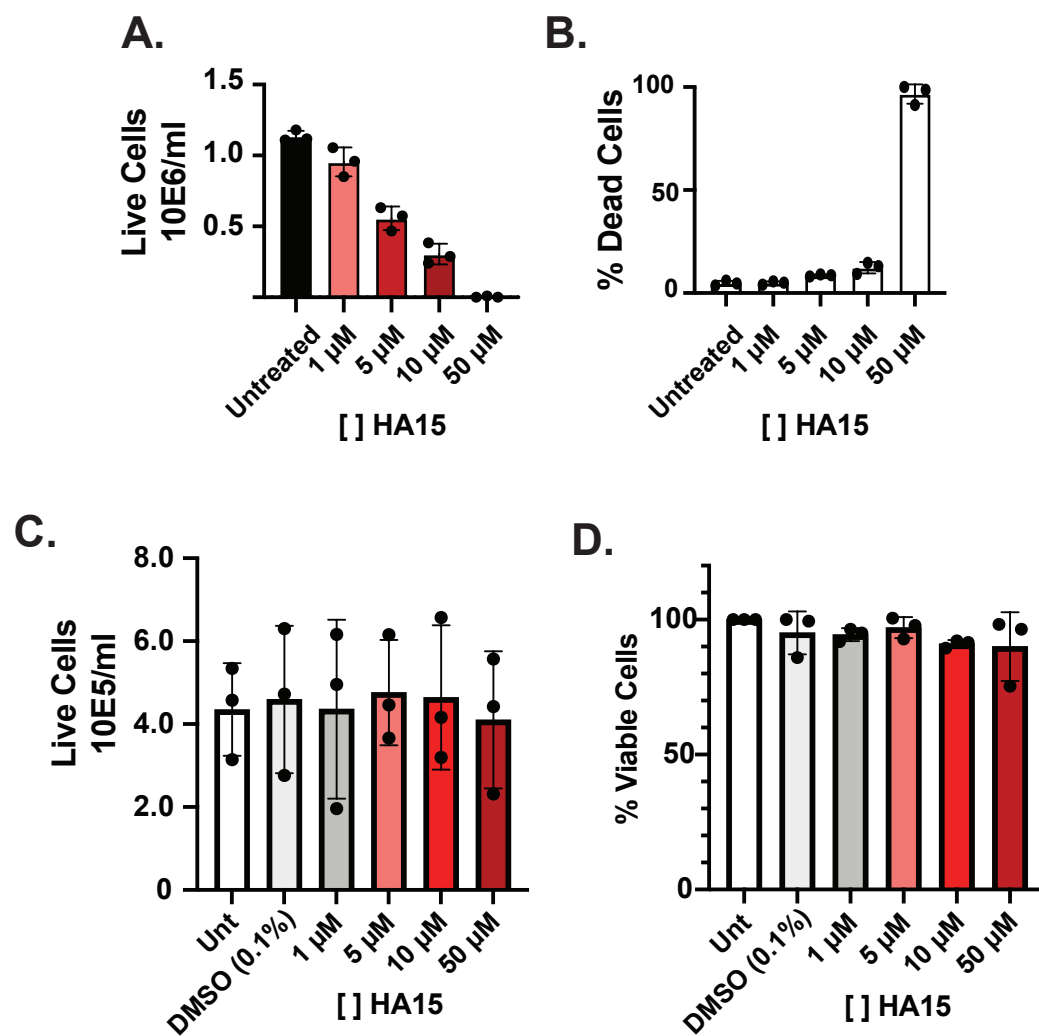

Figure 5. BiP Inhibition with HA15 causes strong cytotostasis in latent PEL-derived cells.



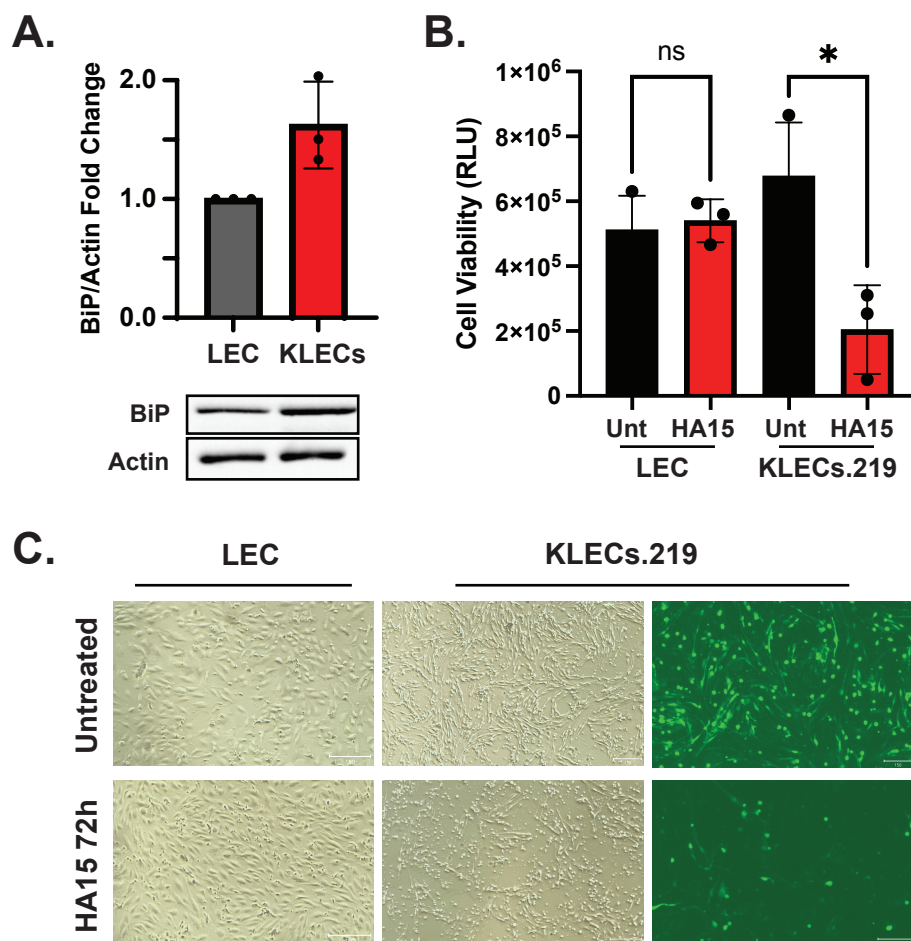

**Figure 6. HA15 has a cytotoxic effect on KSHV-infected LEC cells.**
